# Supplementary material for: The influence of sample distribution on growth model output for a highly-exploited marine fish, the Gulf Corvina (Cynoscion othonopterus)
Source: PeerJ. 2018 Sep 17;6:e5582. doi: 10.7717/peerj.5582 (PMC6148420; doi:10.7717/peerj.5582)
Supplement: Table S3 [file peerj-06-5582-s008.docx]

| Parameter | Estimate | 95% lower CI | 95% upper CI |
| --- | --- | --- | --- |
|  |  |  |  |
| *L∞* | 778.880 | 758.583 | 802.346 |
| *K* | 0.757 | 0.688 | 0.833 |
| *t0* | 1.918 | 1.828 | 2.024 |
|  |  |  |  |
